# Supplementary material for: Vitamin D receptor inhibits EMT via regulation of the epithelial mitochondrial function in intestinal fibrosis
Source: PubMed Central journal article supplement — J Biol Chem. 2021 Mar 11;296:100531. doi: 10.1016/j.jbc.2021.100531 (PMC8054199; doi:10.1016/j.jbc.2021.100531), 2021-03-11
Supplement: mmc1.pdf [file mmc1.pdf]

**Vitamin D receptor inhibits EMT *via* regulation of epithelial mitochondrial function in intestinal fibrosis**

Mengli Yu <sup>a,1</sup>, Hao Wu <sup>b,1</sup>, Jinhai Wang <sup>c,1</sup>, Xueyang Chen<sup>a</sup>, Jiaqi Pan<sup>a</sup>, Peihao Liu<sup>a</sup>, Jie Zhang<sup>a</sup>,  
Yishu Chen<sup>a</sup>, Wei Zhu<sup>a</sup>, Chenxi Tang<sup>a</sup>, Qi Jin<sup>a</sup>, Chunxiao Li<sup>d</sup>, Chao Lu <sup>a</sup>, Hang Zeng<sup>a</sup>,  
Chaohui Yu<sup>a,\*</sup>,Jing Sun <sup>e,\*</sup>

<sup>a</sup>Department of Gastroenterology, the First Affiliated Hospital, College of Medicine, Zhejiang University, Hangzhou, China.

<sup>b</sup>Department of Gastroenterology and Hepatology, Zhongshan Hospital, Fudan University, Shanghai, China.

<sup>c</sup>Department of Colorectal Surgery, the First Affiliated Hospital, College of Medicine, Zhejiang University, Hangzhou, China.

<sup>d</sup>Department of Gastroenterology, Ningbo First Hospital, Ningbo, China.

<sup>e</sup>Department of Gastroenterology, Ruijin Hospital, Shanghai Jiao Tong University School of Medicine, Shanghai, China.

Supplementary materials

Supporting tables

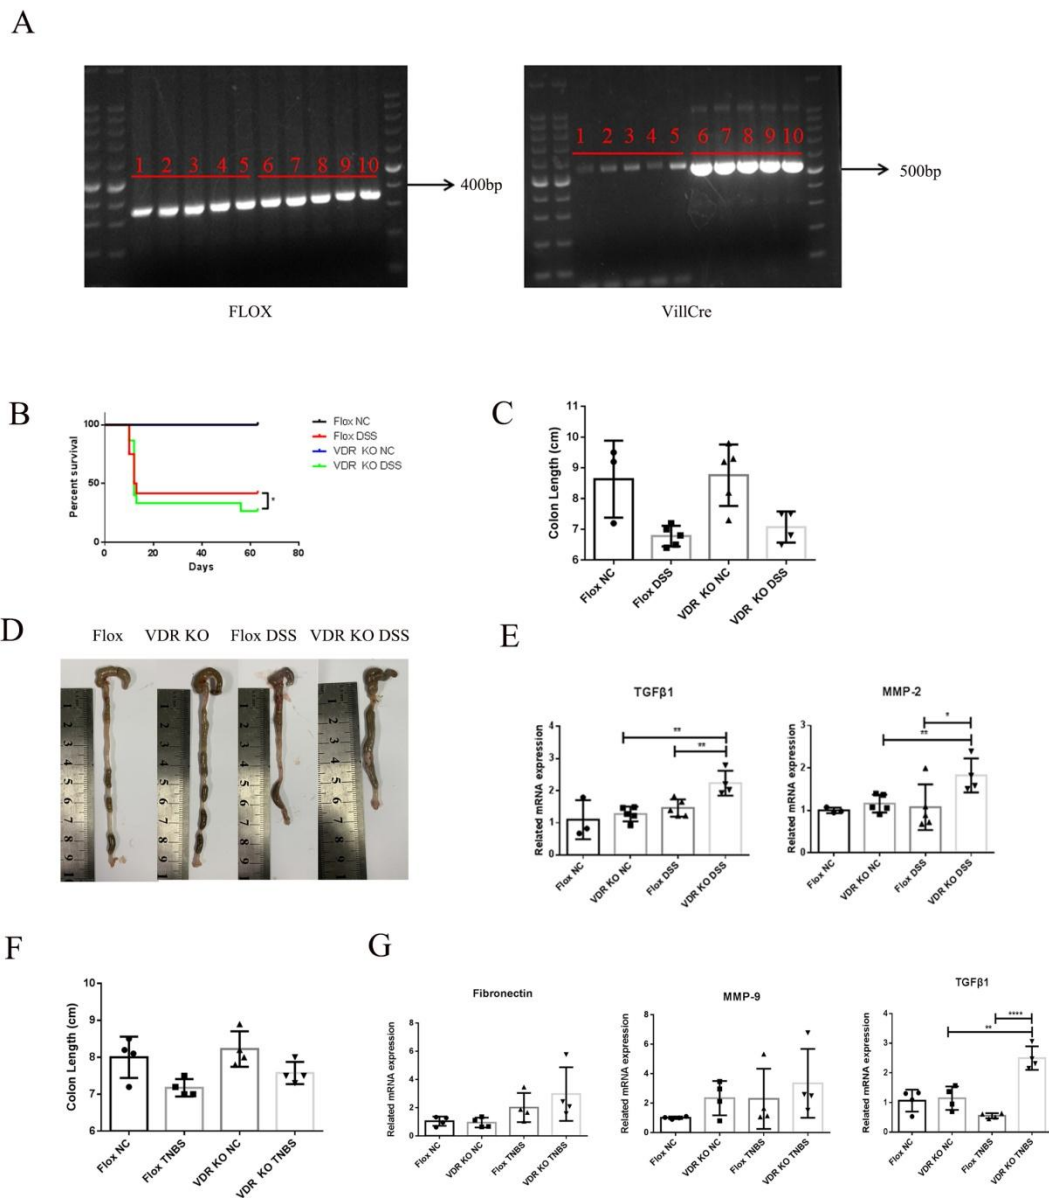

**Supplementary Figure 1: VDR specific knockout in intestinal epithelium exacerbated mouse intestinal fibrosis.** (A) PCR analysis of genomic DNA. VDR<sup>IEC-KO</sup> mice were generated by homologous recombined flox VDR allele, which removed by Cre-mediated recombination (VDR<sup>IEC-KO</sup>, 6 to 10; VDR<sup>fl/fl</sup>, 1 to 5). (B) Survival rates of DSS-induced intestinal fibrosis model mice. (\* $P < 0.05$ , two-tailed, Flox DSS vs VDR KO DSS). (C) Colon length of DSS-induced fibrosis. (D) Representative pictures of mice colons. (E) Quantitative PCR analysis of DSS administrated mice (\* $P < 0.05$ , \*\* $P < 0.01$ , two-tailed). (F) Colon length of TNBS experiment group. (G) Quantitative PCR analysis of TNBS administrated mice (\*\* $P < 0.01$ , \*\*\*\* $P < 0.0001$ , two-tailed).

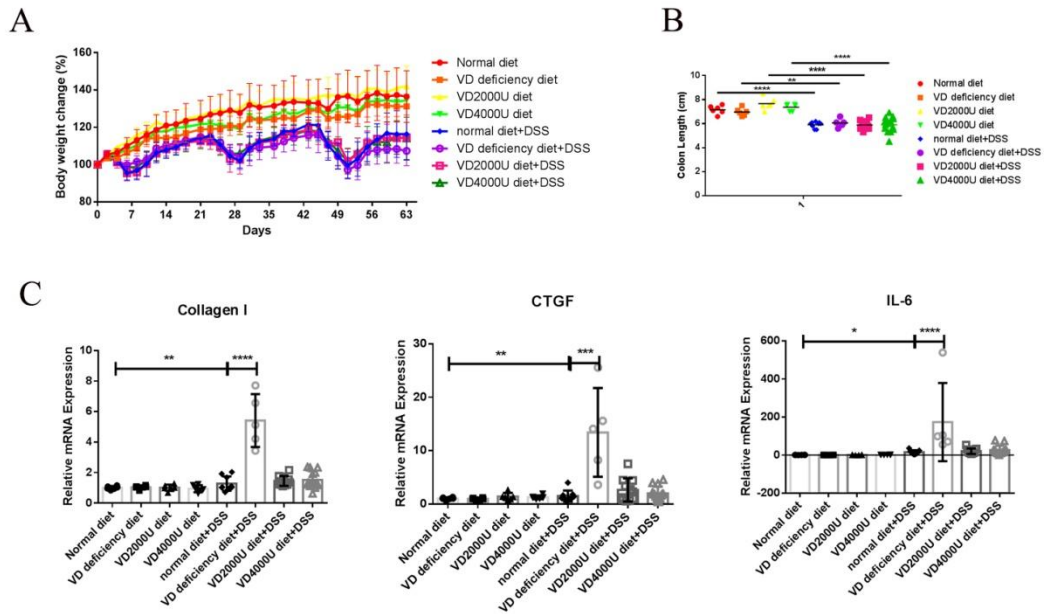

**Supplementary Figure 2: VD dietary intervention influenced DSS-induced intestinal fibrosis.** (A) Body weight change of VD dietary intervention experiment. (B) Colon length of each group. (C) Quantification of gene expression in RNA levels (\* $P < 0.05$ , \*\* $P < 0.01$ , \*\*\* $P < 0.001$ , \*\*\*\* $P < 0.0001$ , two-tailed).

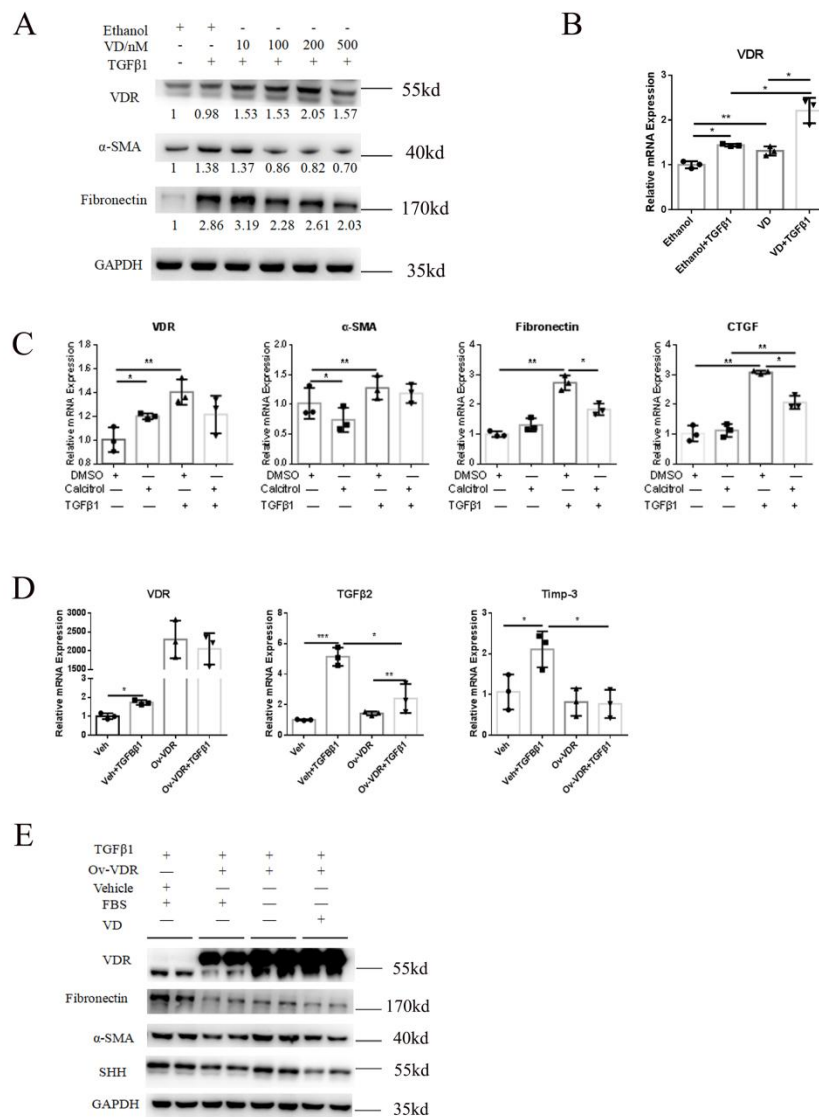

**Supplementary Figure 3: VD dose-independent experiment in primary human intestinal fibroblasts and VDR partially modulated CCD-18Co cells activation *in vitro*.** (A) Western blot analysis of VDR and fibrosis markers expression in primary human intestinal fibroblasts under different concentrations of VD. (B) VDR expression was measured by quantification PCR in VD-treated CCD-18Co cells (n=3, \* $P$ <0.05 \*\* $P$ <0.01, two-tailed). (C) Quantitative PCR analysis of genes in Calcitriol -treated CCD-18Co cells (n=3, \* $P$ <0.05 \*\* $P$ <0.01, two-tailed). (D) Quantitative PCR analysis of genes in VDR overexpression CCD-18Co cells (n=3, \* $P$ <0.05, \*\*\* $P$ <0.001, \*\*\*\* $P$ <0.0001, two-tailed). (E) Western blot analysis of VDR, SHH and fibrosis markers expression in primary human intestinal fibroblasts under the treatment of FBS or/and VD.

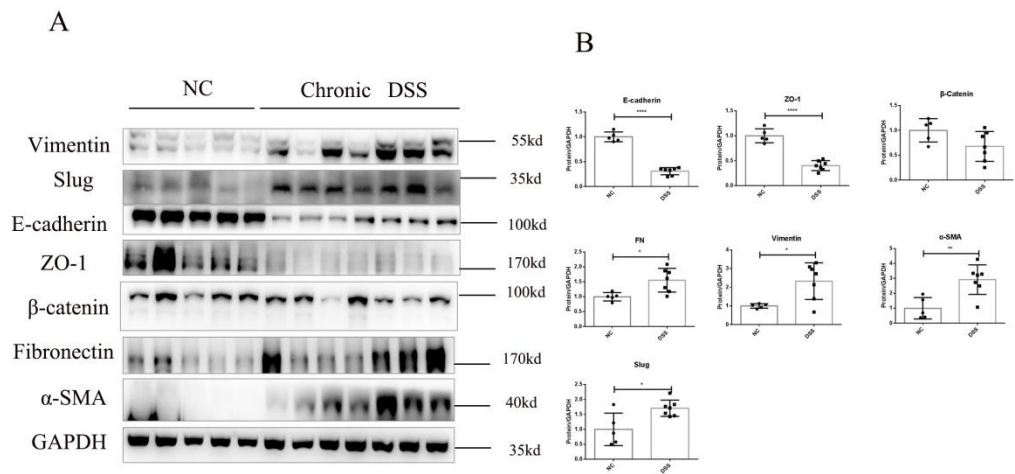

**Supplementary Figure 4: EMT activated in mice chronic DSS-induced intestinal fibrosis.** (A) Western blot analysis of mice colon tissues. (B) Quantification of western blot (NC=5, DSS=7, \* $P$ <0.05 \*\* $P$ <0.01, \*\*\*\* $P$ <0.0001, two-tailed).

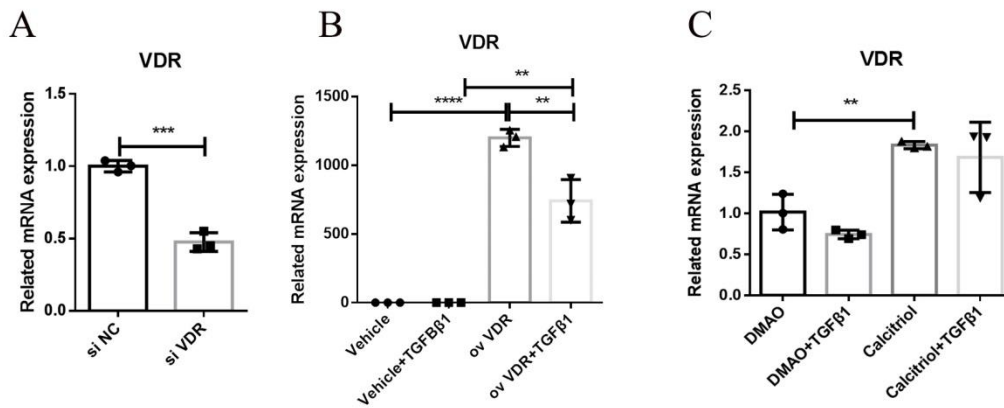

**Supplementary Figure 5: VDR expression in different experiments of HT29 cells.** (A) Quantitative PCR analysis of VDR gene after siRNA transfection (n=3, \*\*\* $P < 0.001$ , two-tailed). (B) Quantitative PCR analysis of VDR gene after VDR plasmid transfection (n=3, \* $P < 0.05$  \*\* $P < 0.01$ , \*\*\*\* $P < 0.0001$ , two-tailed). (C) Quantitative PCR analysis of VDR gene after Calcitriol administration (n=3, \*\* $P < 0.01$ , two-tailed).

A

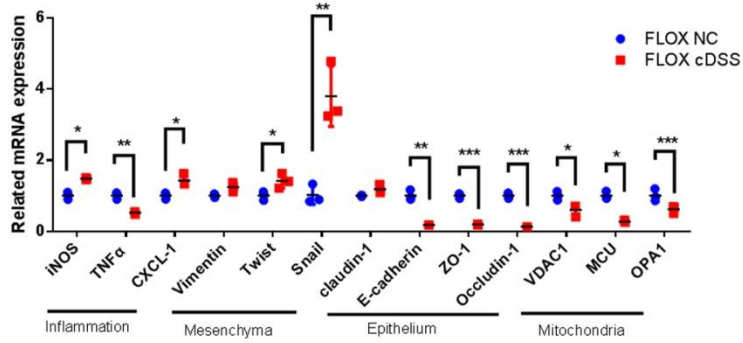

B

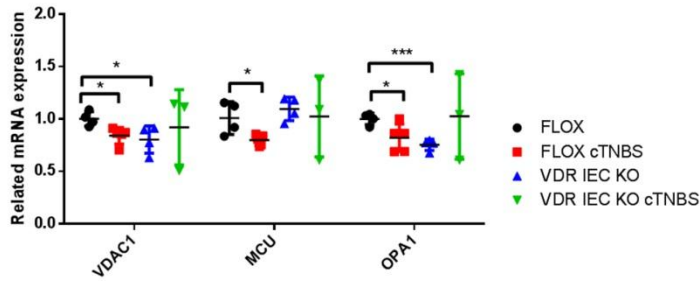

**Supplementary Figure 6: The expression of mitochondrial functional genes in mice.** (A) Quantitative PCR analysis of isolated mice epithelial tissues (n=3, \* $P$ <0.05 \*\* $P$ <0.01, \*\*\* $P$ <0.001, two-tailed). (B) Genes expression were measured by quantitative PCR (Flox NC n=4; Flox TNBS n=4; VDR KO NC n=4; VDR KO TNBS n=4, \* $P$ <0.05, \*\*\* $P$ <0.001, two-tailed).

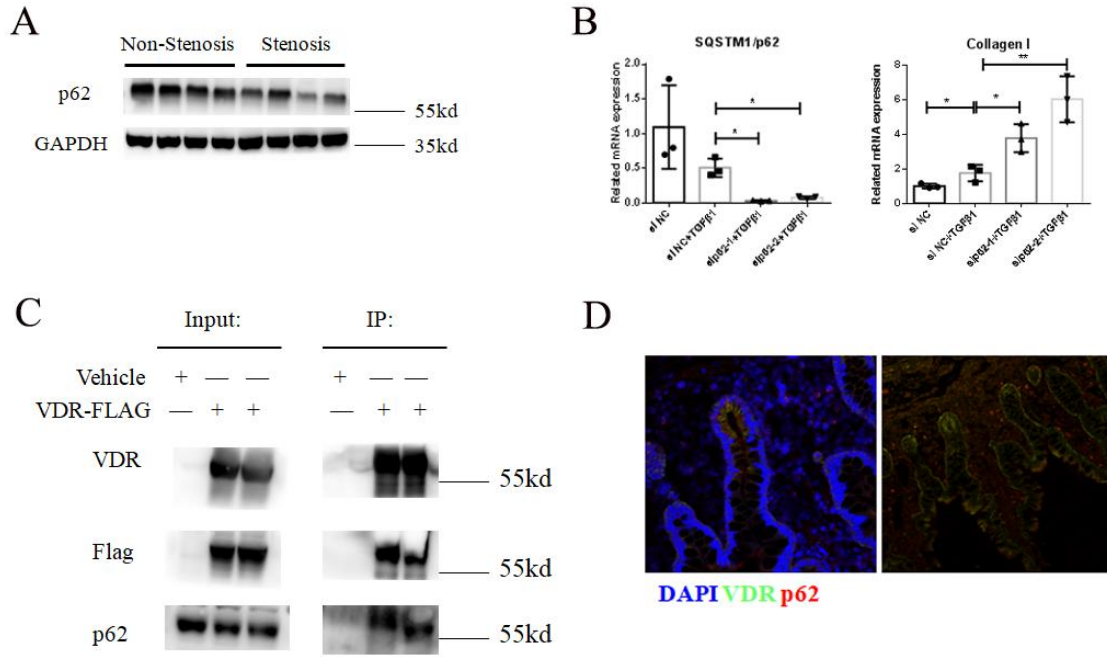

**Supplementary Figure 7: p62 regulated VDR to modulated intestinal fibrosis.** (A) Representative Western blot images of p62 expression. (B) Quantitative PCR analysis of primary human intestinal fibroblasts (n=3, \* $P < 0.05$  \*\* $P < 0.01$ ). (C) HEK293 cells were infected with a FLAG-tagged VDR overexpression plasmid or the empty vector (NC) for 48h were collected, and total FLAG-tagged VDR was immunoprecipitated using FLAG beads. (B) Representative images of immunofluorescence staining of human colon sections. Magnification: 600 $\times$ .



### Supporting Table S1

The characteristics of CD patients

|                    |                          |    |
|--------------------|--------------------------|----|
| Number of patients |                          | 19 |
| Age                | [0-30]                   | 1  |
|                    | [30-45]                  | 12 |
|                    | [45-60]                  | 3  |
|                    | [>60]                    | 3  |
| Male               |                          | 14 |
| Female             |                          | 5  |
| Localization       | Terminal ileum           | 14 |
|                    | Colon                    | 2  |
|                    | Terminal ileum and colon | 3  |
| Complications      | Obstruction              | 18 |
|                    | Perforation              | 2  |
|                    | Sinus formation          | 5  |
|                    | Bleeding                 | 1  |
| Medicine           | Azathioprine             | 16 |
|                    | Hormonotherapy           | 12 |
|                    | Anti-TNF $\alpha$        | 2  |

### Supporting Table S2

#### Primers for mice identification

| Primer name           | Sequence 5'-3'                |
|-----------------------|-------------------------------|
| EGE-LZX-019-5'loxP-F3 | CAGTGACATTGTACTCACATACATGAC   |
| EGE-LZX-019-5'loxP-R3 | TGCATGCGTCTGTGGGGAGG          |
| Vil1-ProF1            | GTGTTTGGTTTGGTTTCCTCTGCATAAGA |
| Cre5R1                | GCAGGCAAATTTTGGTGTACGGTCA     |

#### Primers for Quantitative PCR detection in mice

| Primer name        | Sequence 5'-3'        |
|--------------------|-----------------------|
| m-VDR-F            | GAATGTGCCTCGGATCTGTGG |
| m-VDR-R            | ATGCGGCAATCTCCATTGAAG |
| m-GAPDH-F          | TGGCCTTCCGTGTTTCCTAC  |
| m-GAPDH-R          | GAGTTGCTGTTGAAGTCGCA  |
| m- $\alpha$ SMA -F | CCCAACTGGGACCACATGG   |
| m- $\alpha$ SMA -R | TACATGCGGGGACATTGAAG  |
| m-Fibronectin-F    | ATGTGGACCCCTCCTGATAGT |
| m-Fibronectin-R    | GCCCAGTGATTCAGCAAAGG  |
| m-mmp-9-F          | CTGGACAGCCAGACACTAAAG |
| m-mmp-9-R          | CTCGCGGCAAGTCTTCAGAG  |
| m-TIPM-1-F         | GCAACTCGGACCTGGTCATAA |
| m-TIPM-1-R         | CGGCCCGTGATGAGAAACT   |
| m-Collagen I-F     | TGGGATTCCCTGGACCTAA   |
| m-Collagen I-R     | GCTCCAGCTTCTCCATCTTT  |

|                 |                         |
|-----------------|-------------------------|
| m-CTGF-F        | GGGCCTCTTCTGCGATTTTC    |
| m-CTGF-R        | ATCCAGGCAAGTGCATTGGTA   |
| m-TGFβ1-F       | CCACCTGCAAGACCATCGAC    |
| m-TGFβ1-R       | CTGGCGAGCCTTAGTTTGGAC   |
| m-VDAC1-F       | CCCACATACGCCGATCTTGG    |
| m-VDAC1-R       | GTGGTTTCCGTGTTGGCAGA    |
| m-MCU-F         | GAGCCGCATATTGCAGTACG    |
| m-MCU-R         | CGAGAGGGTAGCCTCACAGAT   |
| m-OPA1-F        | TGGAAAATGGTTCGAGAGTCAG  |
| m-OPA1-R        | CATTCCGTCTCTAGGTTAAAGCG |
| m-Vimentin-F    | CGTCCACACGCACCTACAG     |
| m-Vimentin-R    | GGGGGATGAGGAATAGAGGCT   |
| m-Twist-F       | GGACAAGCTGAGCAAGATTCA   |
| m-Twist-R       | CGGAGAAGGCGTAGCTGAG     |
| m-Snail-F       | CACACGCTGCCTTGTGTCT     |
| m-Snail-R       | GGTCAGCAAAAGCACGGTT     |
| m-Claudin1-F    | GGGGACAACATCGTGACCG     |
| m-Claudin1-R    | AGGAGTCGAAGACTTTGCACT   |
| m- E-Cadherin-F | CAGGTCTCCTCATGGCTTTGC   |
| m- E-Cadherin-R | CTTCCGAAAAGAAGGCTGTCC   |
| m-ZO-1-F        | GCCGCTAAGAGCACAGCAA     |
| m-ZO-1-R        | TCCCCACTCTGAAAATGAGGA   |
| m-Occludin-F    | TTGAAAGTCCACCTCCTTACAGA |
| m-Occludin-R    | CCGGATAAAAAGAGTACGCTGG  |
| m-TNF-α-F       | GCCACCACGCTCTTCTGTCT    |
| m-TNF-α-R       | GTCTGGGCCATAGAACTGAT    |
| m-CXCL1-F       | CTGGGATTCACCTCAAGAACATC |
| m-CXCL1-R       | CAGGGTCAAGGCAAGCCTC     |
| m-iNOS- F       | GTTCTCAGCCCAACAATACAAGA |
| m- iNOS-R       | GTGGACGGGTTCGATGTCAC    |

---

**Primers for Quantitative PCR detection in human**

---

| Primer name      | Sequence 5'-3'         |
|------------------|------------------------|
| h-VDR-F          | GTGGACATCGGCATGATGAAG  |
| h-VDR-R          | GGTCGTAGGTCTTATGGTGGG  |
| h-αSMA -F        | AAAAGACAGCTACGTGGGTGA  |
| h-αSMA -R        | GCCATGTTCTATCGGGTACTTC |
| h-Fibronectin-F  | CGGTGGCTGTCAGTCAAAG    |
| h-Fibronectin-R  | AAACCTCGGCTTCCTCCATAA  |
| h-mmp-9-F        | TGTACCGCTATGGTTACACTCG |
| h-mmp-9-R        | GGCAGGGACAGTTGCTTCT    |
| h-mmp-2-F        | CCCCTGCGGTTTTCTCGAAT   |
| h-mmp-2-R        | CAAAGGGGTATCCATCGCCAT  |
| h-Collagen Iα1-F | GAGGGCCAAGACGAAGACATC  |
| h-Collagen Iα1-R | CAGATCACGTCATCGCACAAAC |

|                 |                         |
|-----------------|-------------------------|
| h-CTGF-F        | CAGCATGGACGTTTCGTCTG    |
| h-CTGF-R        | AACCACGGTTTGGTCCTTGG    |
| h-Zeb1-F        | GATGATGAATGCGAGTCAGATGC |
| h-Zeb1-R        | ACAGCAGTGTCTTGTTGTTGT   |
| h-Vimentin-F    | ATGAAGGAGGAAATGGCTCGTC  |
| h-Vimentin-R    | GGGTATCAACCAGAGGGAGTGAA |
| h-Claudin-1-F   | CCTCCTGGGAGTGATAGCAAT   |
| h-Claudin-1-R   | GGCAACTAAAATAGCCAGACCT  |
| h- E-Cadherin-F | TGGAGGAATTGTTGCTTGC     |
| h- E-Cadherin-R | CGCTCTCCTCCGAAGAAC      |
| h-ZO-1-F        | CAACATACAGTGACGCTTCACA  |
| h-ZO-1-R        | CACTATTGACGTTTCCCCACTC  |

---

Abbreviations: m-, mouse; h-, human
